# Supplementary material for: In the eye of the ophthalmologist: the corneal microbiome in microbial keratitis
Source: Springer Nature journal article supplement (doi:10.1007/s00417-023-06310-y), 2023-11-23
Supplement: MOESM2 [file 26349042]

**Supplementary Table 1 Culture media and incubation conditions for corneal culture, according to “standard culture” and “ESwab culture”, of the 94 episodes of microbial keratitis**

| <b>Culture media<sup>a</sup></b> | <b>Contents/manufacturer</b>                                                                                     | <b>Incubation</b>                                                                             |
|----------------------------------|------------------------------------------------------------------------------------------------------------------|-----------------------------------------------------------------------------------------------|
| Gonococcal agar plate            | GC Medium Base (Becton Dickinson, Sparks, MD, USA) supplemented with chocolatzed defibrinated horse blood        | 5% CO <sub>2</sub> at 36°C                                                                    |
| Blood agar plate                 | 3.9% Columbia Blood Agar Base, (Oxoid, Basingstoke, Hampshire, UK) supplemented with 6% defibrinated horse blood | Day 1: air at 36°C<br>Days 2–7: CO <sub>2</sub> at 36°C                                       |
| Sabouraud agar plate             | 1.3% Agar No 2 (Lab M, Heywood, Bury, UK), 4% D-Glucose (VWR, Leuven, Belgium), 1% Peptone (Becton Dickinson)    | Air at 30°C                                                                                   |
| Fastidious anaerobe broth        | 2.97% FAB (Lab M) supplemented with 1% D-glucose (VWR)                                                           | Air at 36°C. Sub-cultured when growth seen or after 7 days                                    |
| Fastidious anaerobe agar plate   | 4.6% (w/v) LAB 90 Fastidious Anaerobe Agar (Lab M) supplemented with 5% (v/v) horse blood                        | Anaerobic atmosphere (80% N <sub>2</sub> , 10% CO <sub>2</sub> , 10% H <sub>2</sub> ) at 36°C |
| CHROMagar Candida plate          | 4.77% (w/v) (CHROMagar candida (CHROMagar, Paris, France)                                                        | Air at 36°C                                                                                   |
| Anaerobe bottle                  | Blood culture bottle BD Bactec systems standard anaerobic medium (Becton Dickinson, Franklin Lake, NJ, USA)      | Incubator                                                                                     |

<sup>a</sup> For the ESwab culture, 30 µl of the modified Amies transport medium of the ESwab kit was indirectly inoculated onto each of the solid plates and in the fastidious anaerobe broth, and an additional 200 µl was dispensed in the anaerobe bottle.
