# Supplementary material for: In the eye of the ophthalmologist: the corneal microbiome in microbial keratitis
Source: Springer Nature journal article supplement (doi:10.1007/s00417-023-06310-y), 2023-11-23
Supplement: MOESM3 [file 26349042]

**Supplementary Table 2 Topical antibiotics that preceded corneal sampling for culture and sequencing in 16 episodes of microbial keratitis**

| <b>Topical antibiotics</b>           | <b>Patients (n=16)</b> |
|--------------------------------------|------------------------|
| Fluoroquinolones                     | 2                      |
| Chloramphenicol                      | 6                      |
| Fusidic acid                         | 2                      |
| Fluoroquinolones and chloramphenicol | 2                      |
| Other <sup>a</sup>                   | 4                      |

<sup>a</sup> One patient was initially treated with a combination of fluoroquinolones and chloramphenicol that was later adjusted to vancomycin and ceftazidime, two patients received oxytetracycline in combination with hydrocortisone, and one patient was pretreated with a combination of fluoroquinolones, tobramycin, and chloramphenicol. Ten patients discontinued treatment 12–96 h prior to sampling, five did not, and for the remaining patient information on treatment continuation/discontinuation was missing.
