# Supplementary material for: In the eye of the ophthalmologist: the corneal microbiome in microbial keratitis
Source: Springer Nature journal article supplement (doi:10.1007/s00417-023-06310-y), 2023-11-23
Supplement: MOESM4 [file 26349042]

Supplementary Table 3 Microorganisms isolated by standard culture, ESwab culture, or both

| Bacteria                                | Isolated by both standard and ESwab culture | Isolated by standard culture only | Isolated by indirect inoculation of ESwab sample only |
|-----------------------------------------|---------------------------------------------|-----------------------------------|-------------------------------------------------------|
| <i>Staphylococcus aureus</i> (n=6)      | 1                                           | 4                                 | 1                                                     |
| Coagulase-negative staphylococci (n=62) | 14 <sup>a</sup>                             | 22 <sup>b</sup>                   | 26 <sup>c</sup>                                       |
| <i>Streptococcus pneumoniae</i> (n=1)   | 1                                           | 0                                 | 0                                                     |
| <i>Streptococcus mitis</i> (n=1)        | 1                                           | 0                                 | 0                                                     |
| <i>Corynebacterium</i> spp. (n=24)      | 11 <sup>d</sup>                             | 10 <sup>e</sup>                   | 3 <sup>f</sup>                                        |
| <i>Micrococcus</i> spp. (n=1)           | 0                                           | 1                                 | 0                                                     |
| <i>Micrococcus luteus</i> (n=1)         | 0                                           | 1                                 | 0                                                     |
| <i>Nocardia</i> sp. (n=1)               | 1                                           | 0                                 | 0                                                     |
| <i>Brachy bacterium</i> spp. (n=1)      | 0                                           | 1                                 | 0                                                     |
| Gram-positive rod (n=1)                 | 0                                           | 0                                 | 1                                                     |
| <b>Total Gram-positive (n=99)</b>       | <b>29</b>                                   | <b>39</b>                         | <b>31</b>                                             |
| <i>Haemophilus parainfluenzae</i> (n=2) | 1                                           | 0                                 | 1                                                     |
| <i>Moraxella nonliquefaciens</i> (n=2)  | 1                                           | 0                                 | 1                                                     |
| <i>Moraxella</i> spp. (n=1)             | 1                                           | 0                                 | 0                                                     |
| <i>Enterococcus faecalis</i> (n=3)      | 2                                           | 1                                 | 0                                                     |
| <i>Enterobacter cloacae</i> (n=1)       | 0                                           | 0                                 | 1                                                     |
| <i>Pantoea septica</i> (n=2)            | 0                                           | 1                                 | 1                                                     |
| <i>Pseudomonas aeruginosa</i> (n=3)     | 2                                           | 1                                 | 0                                                     |
| <i>Serratia marcescens</i> (n=1)        | 0                                           | 0                                 | 1                                                     |
| <b>Total Gram-negative (n=15)</b>       | <b>7</b>                                    | <b>3</b>                          | <b>5</b>                                              |
| <i>Cutibacterium acnes</i> (n=36)       | 8                                           | 9                                 | 19                                                    |
| <i>Cutibacterium avidum</i> (n=1)       | 0                                           | 0                                 | 1                                                     |
| <i>Veionella parvula</i> (n=1)          | 0                                           | 1                                 | 0                                                     |
| <b>Total anaerobes (n=38)</b>           | <b>8</b>                                    | <b>10</b>                         | <b>20</b>                                             |
| <b>Total bacteria (n=152)</b>           | <b>44</b>                                   | <b>52</b>                         | <b>56</b>                                             |
| <i>Candida albicans</i> (n=1)           | 0                                           | 1                                 | 0                                                     |
| <i>Cladosporium</i> spp. (n=1)          | 0                                           | 1                                 | 0                                                     |

<sup>a</sup> *S. epidermidis* (n=9), *S. capitis* (n=3), *S. lugdunensis* (n=1), *S. warneri* (n=1). <sup>b</sup> *S. epidermidis* (n=18), *S. capitis* (n=3), *S. hominis* (n=1). <sup>c</sup> *S. epidermidis* (n=17), *S. capitis* (n=2), *S. lugdunensis* (n=2), *S. saccharolyticus* (n=1), *S. haemolyticus* (n=1), *S. simulans* (n=1), *S. warneri* (n=1), CoNS – no further identified (n=1). <sup>d</sup> *C. macginleyi* (n=8), *C. propinquum* (n=1), *C. mastitidis* (n=1), *Corynebacterium* spp. (n=1). <sup>e</sup> *C. macginleyi* (n=5), *C. tuberculostearicum* (n=1), *C. accolens* (n=1), *C. bovis* (n=1), *C. pseudodiphtheriticum* (n=1), *Corynebacterium* spp. (n=1). <sup>f</sup> *C. macginleyi* (n=2), *C. accolens* (n=1).
