# Supplementary material for: In the eye of the ophthalmologist: the corneal microbiome in microbial keratitis
Source: Springer Nature journal article supplement (doi:10.1007/s00417-023-06310-y), 2023-11-23
Supplement: MOESM6 [file 26349042]

Supplementary Table 5 Quantile multivariate analysis on variables influencing the absolute bacterial amount form corneal samples dispensed in liquid transport medium obtained from patients with microbial keratitis

| Parameter                                | Coefficient | Standard error | t      | df | Sig  | 95% confidence interval |             |
|------------------------------------------|-------------|----------------|--------|----|------|-------------------------|-------------|
|                                          |             |                |        |    |      | Lower bound             | Upper bound |
| (Intercept)                              | 192.319     | 143.8300       | 1.337  | 82 | .185 | -93.804                 | 478.443     |
| Age at disease onset                     | .923        | 2.2218         | .415   | 82 | .679 | -3.497                  | 5.343       |
| Lesion size (mm)                         | 64.942      | 29.0781        | 2.233  | 82 | .028 | 7.096                   | 122.787     |
| Sampling order (ESwab last)              | -77.646     | 65.8855        | -1.178 | 82 | .242 | -208.713                | 53.421      |
| No topical antibiotics prior to sampling | -7.424      | 88.9931        | -.083  | 82 | .934 | -184.460                | 169.611     |
| No contact lens wear                     | -4.490      | 80.5326        | -.056  | 82 | .956 | -164.695                | 155.716     |
